# Supplementary material
Source: publisher site journal article supplement (https://www.dovepress.com/article/114738)
Supplement: Supplementary file 1 [file get_supplementary_file.php]

## Supplementary materials

**Table S1** Baseline characteristics

|                                               | <b>Tiotropium 5 µg</b> | <b>Tiotropium + olodaterol<br/>5/5 µg</b> |
|-----------------------------------------------|------------------------|-------------------------------------------|
| <b>Participants</b>                           | 1033                   | 1029                                      |
| <b>Male</b>                                   | 755 (73.1)             | 733 (71.2)                                |
| <b>Pre-bronchodilator FEV<sub>1</sub> mL</b>  | 1200 ± 504             | 1180 ± 493                                |
| <b>Post-bronchodilator FEV<sub>1</sub> mL</b> | 1370 ± 521             | 1344 ± 505                                |
| <b>GOLD II</b>                                | 517 (50.0)             | 508 (48.8)                                |
| <b>GOLD III</b>                               | 347 (37.5)             | 408 (39.7)                                |
| <b>GOLD IV</b>                                | 128 (12.4)             | 119 (11.6)                                |

FEV<sub>1</sub> mL: Forced Expiratory Volume in 1 second in milliliters

**Table S2** Clinical input values by GOLD severity stage

|                 | Annual tFEV <sub>1</sub> decline | Utility               |
|-----------------|----------------------------------|-----------------------|
| <b>GOLD II</b>  | 37.1 mL                          | 0.787 (0.771 - 0.802) |
| <b>GOLD III</b> | 30.7 mL                          | 0.750 (0.731 - 0.768) |
| <b>GOLD IV</b>  | 24.2 mL                          | 0.647 (0.598 - 0.695) |

mL: milliliter

**Table S3** Moderate exacerbation risk logistic regression analysis

|                                               | Coef      | Std. Error | Z      | P> z  | 95% Conf  | Interval  |
|-----------------------------------------------|-----------|------------|--------|-------|-----------|-----------|
| <b>Moderate exacerbation in previous year</b> | .2962704  | .0328924   | 9.01   | 0.000 | .2318024  | .3607383  |
| <b>Hospitalization in previous year</b>       | .0421766  | .040818    | 1.03   | 0.301 | -.0378252 | .1221784  |
| <b>FEV<sub>1</sub>% predicted</b>             | -.0120495 | .0016381   | -7.36  | 0.000 | -.0152602 | -.0088388 |
| <b>Age in months</b>                          | .000375   | .0002307   | 1.63   | 0.104 | -.0000772 | .0008272  |
| <b>Constant</b>                               | -3.2075   | .1962957   | -16.34 | 0.000 | -3.592233 | -2.822768 |

FEV<sub>1</sub> % predicted: Forced Expiratory Volume in 1 second of percent predicted

**Table S4** Severe exacerbation risk logistic regression analysis

|                                               | Coef      | Std. Error | Z      | P> z  | 95% Conf  | Interval  |
|-----------------------------------------------|-----------|------------|--------|-------|-----------|-----------|
| <b>Moderate exacerbation in previous year</b> | .1723609  | .0345583   | 4.99   | 0.000 | .1046279  | .2400939  |
| <b>Hospitalization in previous year</b>       | .3673385  | .0594212   | 6.18   | 0.000 | .2508752  | .4838019  |
| <b>FEV<sub>1</sub>% predicted</b>             | -.0506315 | .0035473   | -14.27 | 0.000 | -.0575841 | -.043679  |
| <b>Age in months</b>                          | .002943   | .0004814   | 6.11   | 0.000 | .0019993  | .0038866  |
| <b>Constant</b>                               | -5.272451 | .4052518   | -13.01 | 0.000 | -6.06673  | -4.478172 |

FEV<sub>1</sub> % predicted: Forced Expiratory Volume in 1 second of percent predicted

**Table S5** Statistical distributions used in the PSA

| <b>Parameter</b>                 | <b>Statistical distribution</b> |
|----------------------------------|---------------------------------|
| <b>Lung function improvement</b> | Lognormal                       |
| <b>Lung function decline</b>     | Beta                            |
| <b>Risk of exacerbation</b>      | Normal                          |
| <b>Mortality</b>                 | Lognormal                       |
| <b>Costs</b>                     | Gamma                           |
| <b>Utility values</b>            | Beta                            |

**Table S6** Market share projections (with [lower table] and without [upper table] tiotropium-olodaterol) as provided by manufacturer

|                               | Year 1 | Year 2 | Year 2 | Year 4 | Year 5 |
|-------------------------------|--------|--------|--------|--------|--------|
| <b>Tiotropium (5 /18 mcg)</b> | 33,1%  | 31,6%  | 30,6%  | 29,6%  | 29,1%  |
| <b>GLY/IND</b>                | 4,2%   | 4,1%   | 5,0%   | 5,9%   | 6,3%   |
| <b>UMEC/VI</b>                | 1,2%   | 2,3%   | 2,8%   | 3,3%   | 3,5%   |
| <b>ACL/FM</b>                 | 0,6%   | 2,7%   | 3,3%   | 3,9%   | 4,2%   |
| <b>TIO+SM</b>                 | 17,3%  | 16,7%  | 16,3%  | 15,9%  | 15,7%  |
| <b>FF/VI 100/25</b>           | 0,7%   | 0,6%   | 0,6%   | 0,6%   | 0,6%   |
| <b>BUD/FM 320/90</b>          | 13,9%  | 13,6%  | 13,4%  | 13,2%  | 13,1%  |
| <b>SFC 50/500</b>             | 29,1%  | 28,5%  | 28,1%  | 27,7%  | 27,5%  |
| <b>TOTAL</b>                  | 100,0% | 100,0% | 100,0% | 100,0% | 100,0% |

|                               | Year 1 | Year 2 | Year 2 | Year 4 | Year 5 |
|-------------------------------|--------|--------|--------|--------|--------|
| <b>Tio + Olo FDC</b>          | 0,6%   | 2,3%   | 6,1%   | 7,2%   | 7,7%   |
| <b>Tiotropium (5 /18 mcg)</b> | 33,1%  | 31,6%  | 30,6%  | 29,6%  | 29,1%  |
| <b>GLY/IND</b>                | 4,0%   | 3,2%   | 2,5%   | 3,0%   | 3,2%   |
| <b>UMEC/VI</b>                | 1,0%   | 1,6%   | 0,9%   | 1,1%   | 1,2%   |
| <b>ACL/FM</b>                 | 0,4%   | 2,0%   | 1,5%   | 1,8%   | 1,9%   |
| <b>TIO+SM</b>                 | 17,3%  | 16,7%  | 16,3%  | 15,9%  | 15,7%  |
| <b>FF/VI 100/25</b>           | 0,7%   | 0,6%   | 0,6%   | 0,6%   | 0,6%   |
| <b>BUD/FM 320/90</b>          | 13,9%  | 13,6%  | 13,4%  | 13,2%  | 13,1%  |
| <b>SFC 50/500</b>             | 29,1%  | 28,5%  | 28,1%  | 27,7%  | 27,5%  |
| <b>TOTAL</b>                  | 100,0% | 100,0% | 100,0% | 100,0% | 100,0% |

ACL/FM: aclidinium/formoterol; BUD/FM: budesonide/formoterol; FDC: fixed dose combination; FF/VI: fluticasone/vilanterol; GLY/IND: glycopyrronium/indacaterol; SFC: salmeterol/fluticasone combination; TIO+SM: tiotropium+salmeterol; UMEC/VI: umeclidinium/vilanterol
